# Supplementary material
Source: PubMed Central journal article supplement (PMC5946057)
Supplement: NIHMS963271-supplement-Supplemental_files.pdf [file NIHMS963271-supplement-Supplemental_files.pdf]

## **Supplemental Material**

Supplement to Hoffmann U, Ferencik M, Udelson JE, et al. Prognostic value of noninvasive cardiovascular testing in patients with stable chest pain: insights from the PROMISE trial.

## **Table of Contents**

Supplemental Table 1. Baseline characteristics of the population for prognostic analysis vs. the patients enrolled but not included.

Supplemental Table 2. Frequency of test findings and association with clinical events for anatomic and functional testing for a definition of nonobstructive coronary artery disease from 1-49%.

Supplemental Table 3. Test findings and clinical events in 4602 patients randomized to the functional arm of PROMISE according to the functional test performed.

Supplemental Table 4. Frequency of test findings and association with clinical events for anatomic and functional testing in patients prespecified to receive stress nuclear perfusion imaging.

Supplemental Table 5. Sensitivity analysis of the association of the definition of normal functional testing with and without consideration of the cardiovascular risk factors (Framingham Risk Score).

Supplemental Figure 1. Kaplan-Meier curves demonstrating cumulative event rates based on the presence of myocardial ischemia and obstructive CAD for anatomic testing (A) and functional testing (B).

**Supplemental Table 1.** Baseline characteristics of the population for prognostic analysis vs. the patients enrolled but not included.\*

| Variable                                                                         | Patients included in the Prognostic Analysis (N=9118) | Excluded Patients (N=885) | P Value |
|----------------------------------------------------------------------------------|-------------------------------------------------------|---------------------------|---------|
| <b>Demographics</b>                                                              |                                                       |                           |         |
| Mean age — yr                                                                    | 60.7 ± 8.2                                            | 61.1 ± 8.9                | 0.742   |
| Female sex — no. (%)                                                             | 4796 (52.6%)                                          | 474 (53.6%)               | 0.585   |
| Racial or ethnic minority — no. (%)                                              | 2006 (22.1%)                                          | 242 (27.5%)               | <0.001  |
| <b>Cardiac risk factors</b>                                                      |                                                       |                           |         |
| Mean body mass index (kg/m <sup>2</sup> )                                        | 30.4 ± 6.0                                            | 31.1 ± 7.1                | 0.214   |
| Hypertension — no. (%)                                                           | 5904 (64.8%)                                          | 597 (67.5%)               | 0.098   |
| Diabetes — no. (%)                                                               | 1940 (21.3%)                                          | 204 (23.1%)               | 0.213   |
| Dyslipidemia — no. (%)                                                           | 6169 (67.7%)                                          | 598 (67.6%)               | 0.995   |
| Family history of premature CAD — no. (%)                                        | 2891 (31.8%)                                          | 311 (35.3%)               | 0.034   |
| Peripheral or cerebrovascular disease — no. (%)                                  | 495 (5.4%)                                            | 57 (6.4%)                 | 0.205   |
| CAD equivalent — no. (%)                                                         | 2293 (25.1%)                                          | 238 (26.9%)               | 0.254   |
| History of heart failure — no. (%)                                               | 339 (3.7%)                                            | 26 (2.9%)                 | 0.239   |
| Metabolic syndrome — no. (%)                                                     | 3441 (37.7%)                                          | 331 (37.4%)               | 0.843   |
| Current or past tobacco use — no. (%)                                            | 4672 (51.3%)                                          | 432 (48.9%)               | 0.176   |
| Sedentary lifestyle — no. (%)                                                    | 4419 (48.6%)                                          | 447 (50.7%)               | 0.216   |
| History of depression — no. (%)                                                  | 1878 (20.6%)                                          | 180 (20.4%)               | 0.881   |
| <b>Risk factor burden</b>                                                        |                                                       |                           |         |
| No major risk factors — no. (%)                                                  | 246 (2.7%)                                            | 17 (1.9%)                 | 0.168   |
| Mean number of risk factors per patient                                          | 2.4 ± 1.1                                             | 2.4 ± 1.0                 | 0.149   |
| Mean combined Diamond and Forrester and Coronary Artery Surgery Study risk score | 53.2 ± 21.3                                           | 53.6 ± 22.5               | 0.378   |
| <b>Framingham risk score — no. (%)</b>                                           |                                                       |                           |         |
| Low risk (<6%)                                                                   | 620 (6.8%)                                            | 66 (7.5%)                 | 0.668   |
| Intermediate risk (6-20%)                                                        | 4672 (51.3%)                                          | 442 (50.1%)               |         |
| High risk (>20%)                                                                 | 3814 (41.9%)                                          | 374 (42.4%)               |         |
| <b>ASCVD pooled cohort risk prediction (2013) — no. (%)</b>                      |                                                       |                           |         |
| Low risk (<7.5%)                                                                 | 2919 (32.3%)                                          | 285 (32.7%)               | 0.831   |
| Elevated risk (≥7.5%)                                                            | 6110 (67.7%)                                          | 587 (67.3%)               |         |
| <b>Relevant medications — no. (%)</b>                                            |                                                       |                           |         |
| Beta-blocker                                                                     | 2166 (24.8%)                                          | 233 (27.6%)               | 0.079   |
| ACE inhibitor or ARB                                                             | 3823 (43.8%)                                          | 371 (43.9%)               | 0.963   |
| Statin                                                                           | 3994 (45.8%)                                          | 395 (46.7%)               | 0.591   |
| Aspirin                                                                          | 3896 (44.7%)                                          | 384 (45.4%)               | 0.661   |
| <b>Primary presenting symptom and anginal type — no. (%)</b>                     |                                                       |                           |         |
| Chest pain                                                                       | 6630 (72.8%)                                          | 642 (72.6%)               | 0.931   |
| Dyspnea on exertion                                                              | 1369 (15.0%)                                          | 121 (13.7%)               | 0.287   |
| <b>Anginal type — site-reported</b>                                              |                                                       |                           |         |
| Typical                                                                          | 1044 (11.4%)                                          | 122 (13.8%)               | 0.099   |
| Atypical                                                                         | 7107 (77.9%)                                          | 666 (75.3%)               |         |
| Non-anginal                                                                      | 967 (10.6%)                                           | 97 (11.0%)                |         |

\* Plus-minus values are means ±SD. ACE indicates angiotensin-converting enzyme; ARB, angiotensin-receptor blocker; and CAD, coronary artery disease.

**Supplemental Table 2.** Frequency of test findings and association with clinical events for anatomic and functional testing for a definition of nonobstructive coronary artery disease from 1-49%.

| Test Results                     | Anatomic Testing<br>(N=4516)       |                          |                          |         | Functional Testing<br>(N=4602)     |                          |                          |         |
|----------------------------------|------------------------------------|--------------------------|--------------------------|---------|------------------------------------|--------------------------|--------------------------|---------|
|                                  | Results<br>Frequency—<br>no./N (%) | Event Rate—<br>no./N (%) | Hazard Ratio<br>(95% CI) | P Value | Results<br>Frequency—<br>no./N (%) | Event Rate—<br>no./N (%) | Hazard Ratio<br>(95% CI) | P Value |
| <b>All-cause<br/>death/MI/UA</b> |                                    |                          |                          |         |                                    |                          |                          |         |
| Severely<br>Abnormal             | 632/4516 (14.0)                    | 56/632 (8.9)             | 8.55<br>(4.62–15.83)     | <0.0001 | 365/4602 (7.9)                     | 35/365 (9.6)             | 3.88<br>(2.58–5.85)      | <0.0001 |
| Moderately<br>Abnormal           | 449/4516 (9.9)                     | 21/449 (4.7)             | 4.82<br>(2.42–9.63)      | <0.0001 | 217/4602 (4.7)                     | 13/217 (6.0)             | 2.65<br>(1.46–4.83)      | 0.0014  |
| Mildly Abnormal                  | 1930/4516 (42.7)                   | 46/1930 (2.4)            | 2.38<br>(1.30–4.38)      | 0.0051  | 432/4602 (9.4)                     | 9/432 (2.1)              | 0.94<br>(0.47–1.89)      | 0.8666  |
| Normal                           | 1505/4516 (33.3)                   | 14/1505 (0.9)            | REF                      |         | 3588/4602 (78.0)                   | 75/3588 (2.1)            | REF                      |         |
| <b>CV death/MI/UA</b>            |                                    |                          |                          |         |                                    |                          |                          |         |
| Severely<br>Abnormal             | 632/4516 (14.0)                    | 50/632 (7.9)             | 14.11<br>(6.50–30.65)    | <0.0001 | 365/4602 (7.9)                     | 31/365 (8.5)             | 4.59<br>(2.93–7.19)      | <0.0001 |
| Moderately<br>Abnormal           | 449/4516 (9.9)                     | 19/449 (4.2)             | 7.97<br>(3.44–18.47)     | <0.0001 | 217/4602 (4.7)                     | 13/217 (6.0)             | 3.50<br>(1.89–6.48)      | <0.0001 |
| Mildly Abnormal                  | 1930/4516 (42.7)                   | 32/1930 (1.7)            | 2.99<br>(1.37–6.56)      | 0.0061  | 432/4602 (9.4)                     | 8/432 (1.9)              | 1.11<br>(0.53–2.34)      | 0.7834  |
| Normal                           | 1505/4516 (33.3)                   | 8/1505 (0.5)             | REF                      |         | 3588/4602 (78.0)                   | 56/3588 (1.6)            | REF                      |         |
| <b>CV death/MI</b>               |                                    |                          |                          |         |                                    |                          |                          |         |
| Severely<br>Abnormal             | 632/4516 (14.0)                    | 20/632 (3.2)             | 4.85<br>(1.96–12.04)     | 0.0007  | 365/4602 (7.9)                     | 14/365 (3.9)             | 2.13<br>(1.16–3.91)      | 0.0141  |
| Moderately<br>Abnormal           | 449/4516 (9.9)                     | 9/449 (2.0)              | 3.65<br>(1.33–10.04)     | 0.0122  | 217/4602 (4.7)                     | 5/217 (2.3)              | 1.53<br>(0.60–3.90)      | 0.3681  |
| Mildly Abnormal                  | 1930/4516 (42.7)                   | 24/1930 (1.2)            | 2.23<br>(0.94–5.27)      | 0.0671  | 432/4602 (9.4)                     | 5/432 (1.2)              | 0.81<br>(0.32–2.04)      | 0.6542  |
| Normal                           | 1505/4516 (33.3)                   | 7/1505 (0.5)             | REF                      |         | 3588/4602 (78.0)                   | 48/3588 (1.3)            | REF                      |         |

CV indicates cardiovascular; MI, myocardial infarction; and UA, unstable angina.

**Supplemental Table 3.** Test findings and clinical events in 4602 patients randomized to the functional arm of PROMISE according to the functional test performed.

|                              | <b>Exercise Treadmill<br/>N=467 (10.1%)</b> |                      | <b>Stress Echocardiography<br/>N=1019 (22.1%)</b> |                      | <b>Stress Nuclear Perfusion<br/>N=3116 (67.8%)</b> |                      |
|------------------------------|---------------------------------------------|----------------------|---------------------------------------------------|----------------------|----------------------------------------------------|----------------------|
|                              | <b>No. of Patients</b>                      | <b>No. of Events</b> | <b>No. of Patients</b>                            | <b>No. of Events</b> | <b>No. of patients</b>                             | <b>No. of Events</b> |
| <b>All cause death/MI/UA</b> |                                             |                      |                                                   |                      |                                                    |                      |
| Severely Abnormal            | 0                                           | 0                    | 66                                                | 4                    | 299                                                | 31                   |
| Moderately Abnormal          | 59                                          | 2                    | 16                                                | 0                    | 142                                                | 11                   |
| Mildly Abnormal              | 77                                          | 1                    | 57                                                | 2                    | 298                                                | 6                    |
| Normal                       | 331                                         | 3                    | 880                                               | 14                   | 2377                                               | 58                   |
| <b>CV death/MI/UA</b>        |                                             |                      |                                                   |                      |                                                    |                      |
| Severely Abnormal            | 0                                           | 0                    | 66                                                | 4                    | 299                                                | 27                   |
| Moderately Abnormal          | 59                                          | 2                    | 16                                                | 0                    | 142                                                | 11                   |
| Mildly Abnormal              | 77                                          | 0                    | 57                                                | 2                    | 298                                                | 6                    |
| Normal                       | 331                                         | 3                    | 880                                               | 7                    | 2377                                               | 46                   |
| <b>CV death/MI</b>           |                                             |                      |                                                   |                      |                                                    |                      |
| Severely Abnormal            | 0                                           | 0                    | 66                                                | 2                    | 299                                                | 12                   |
| Moderately Abnormal          | 59                                          | 0                    | 16                                                | 0                    | 142                                                | 5                    |
| Mildly Abnormal              | 77                                          | 0                    | 57                                                | 0                    | 298                                                | 5                    |
| Normal                       | 331                                         | 2                    | 880                                               | 6                    | 2377                                               | 40                   |

CV indicates cardiovascular; MI, myocardial infarction; and UA, unstable angina.

**Supplemental Table 4.** Frequency of test findings and association with clinical events for anatomic and functional testing in patients prespecified to receive stress nuclear perfusion imaging.

| Initial Test Results         | Anatomical Testing<br>(N=3050) |                      |                          |         | Functional Testing<br>(N=3136) |                      |                          |         |
|------------------------------|--------------------------------|----------------------|--------------------------|---------|--------------------------------|----------------------|--------------------------|---------|
|                              | Frequency<br>n/N(%)            | Event Rate<br>n/N(%) | Hazard Ratio<br>(95% CI) | P-value | Frequency<br>n/N(%)            | Event Rate<br>n/N(%) | Hazard Ratio<br>(95% CI) | P-value |
| <b>All cause death/MI/UA</b> |                                |                      |                          |         |                                |                      |                          |         |
| Severely Abnormal            | 199/3050 (6.52)                | 21/199 (10.55)       | 14.49<br>(5.67, 37.04)   | <.0001  | 299/3136 (9.53)                | 31/299 (10.37)       | 4.34<br>(2.77, 6.78)     | <.0001  |
| Moderately Abnormal          | 191/3050 (6.26)                | 16/191 (8.38)        | 12.07<br>(4.63, 31.48)   | <.0001  | 146/3136 (4.66)                | 12/146 (8.22)        | 3.14<br>(1.67, 5.91)     | 0.0004  |
| Mildly Abnormal              | 1699/3050 (55.70)              | 52/1699 (3.06)       | 4.33<br>(1.84, 10.21)    | 0.0008  | 298/3136 (9.50)                | 6/298 (2.01)         | 0.81<br>(0.35, 1.89)     | 0.6277  |
| Normal                       | 961/3050 (31.51)               | 6/961 (0.62)         | REF                      |         | 2393/3136 (76.31)              | 55/2393 (2.30)       | REF                      |         |
| <b>CV death/MI/UA</b>        |                                |                      |                          |         |                                |                      |                          |         |
| Severely Abnormal            | 199/3050 (6.52)                | 19/199 (9.55)        | 19.59<br>(6.45, 59.50)   | <.0001  | 299/3136 (9.53)                | 27/299 (9.03)        | 4.80<br>(2.95, 7.80)     | <.0001  |
| Moderately Abnormal          | 191/3050 (6.26)                | 13/191 (6.81)        | 14.81<br>(4.73, 46.39)   | <.0001  | 146/3136 (4.66)                | 12/146 (8.22)        | 4.04<br>(2.11, 7.72)     | <.0001  |
| Mildly Abnormal              | 1699/3050 (55.70)              | 40/1699 (2.35)       | 5.03<br>(1.78, 14.22)    | 0.0023  | 298/3136 (9.50)                | 6/298 (2.01)         | 1.03<br>(0.44, 2.42)     | 0.9450  |
| Normal                       | 961/3050 (31.51)               | 4/961 (0.42)         | REF                      |         | 2393/3136 (76.31)              | 44/2393 (1.84)       | REF                      |         |
| <b>CV death/MI</b>           |                                |                      |                          |         |                                |                      |                          |         |
| Severely Abnormal            | 199/3050 (6.52)                | 8/199 (4.02)         | 6.90<br>(1.74, 27.34)    | 0.0060  | 299/3136 (9.53)                | 12/299 (4.01)        | 2.21<br>(1.15, 4.26)     | 0.0179  |
| Moderately Abnormal          | 191/3050 (6.26)                | 4/191 (2.09)         | 4.36<br>(0.95, 20.11)    | 0.0588  | 146/3136 (4.66)                | 5/146 (3.42)         | 1.86<br>(0.72, 4.77)     | 0.1982  |
| Mildly Abnormal              | 1699/3050 (55.70)              | 27/1699 (1.59)       | 3.51<br>(1.04, 11.83)    | 0.0429  | 298/3136 (9.50)                | 5/298 (1.68)         | 0.98<br>(0.39, 2.51)     | 0.9740  |
| Normal                       | 961/3050 (31.51)               | 3/961 (0.31)         | REF                      |         | 2393/3136 (76.31)              | 38/2393 (1.59)       | REF                      |         |

CV indicates cardiovascular; MI, myocardial infarction; and UA, unstable angina.

**Supplemental Table 5.** Sensitivity analysis of the association of the definition of normal functional testing with and without consideration of the cardiovascular risk factors (Framingham Risk Score).

| Initial Test Results         | Functional Testing – original definition<br>(N=4602) |                       |                          |         | Functional Testing – New mildly abnormal definition<br>(N=4602) |                       |                          |         |
|------------------------------|------------------------------------------------------|-----------------------|--------------------------|---------|-----------------------------------------------------------------|-----------------------|--------------------------|---------|
|                              | Frequency<br>n/N (%)                                 | Event Rate<br>n/N (%) | Hazard Ratio<br>(95% CI) | P-value | Frequency<br>n/N (%)                                            | Event Rate<br>n/N (%) | Hazard Ratio<br>(95% CI) | P-value |
| <b>All cause death/MI/UA</b> |                                                      |                       |                          |         |                                                                 |                       |                          |         |
| Severely Abnormal            | 365/4602 (7.93)                                      | 35/365 (9.59)         | 3.88<br>(2.58, 5.85)     | <.0001  | 365/4602 (7.93)                                                 | 35/365 (9.59)         | 6.01<br>(2.68, 13.51)    | <.0001  |
| Moderately Abnormal          | 217/4602 (4.72)                                      | 13/217 (5.99)         | 2.65<br>(1.46, 4.83)     | 0.0014  | 217/4602 (4.72)                                                 | 13/217 (5.99)         | 4.14<br>(1.64, 10.45)    | 0.0026  |
| Mildly Abnormal              | 432/4602 (9.39)                                      | 9/432 (2.08)          | 0.94<br>(0.47, 1.89)     | 0.8666  | 3146/4602 (68.36)                                               | 76/3146 (2.42)        | 1.61<br>(0.75, 3.45)     | 0.2219  |
| Normal                       | 3588/4602 (77.97)                                    | 75/3588 (2.09)        | REF                      |         | 874/4602 (18.99)                                                | 8/874 (0.92)          | REF                      |         |
| <b>CV death/MI/UA</b>        |                                                      |                       |                          |         |                                                                 |                       |                          |         |
| Severely Abnormal            | 365/4602 (7.93)                                      | 31/365 (8.49)         | 4.59<br>(2.93, 7.19)     | <.0001  | 365/4602 (7.93)                                                 | 31/365 (8.49)         | 6.05<br>(2.54, 14.41)    | <.0001  |
| Moderately Abnormal          | 217/4602 (4.72)                                      | 13/217 (5.99)         | 3.50<br>(1.89, 6.48)     | <.0001  | 217/4602 (4.72)                                                 | 13/217 (5.99)         | 4.63<br>(1.76, 12.24)    | 0.0020  |
| Mildly Abnormal              | 432/4602 (9.39)                                      | 8/432 (1.85)          | 1.11<br>(0.53, 2.34)     | 0.7834  | 3146/4602 (68.36)                                               | 57/3146 (1.81)        | 1.38<br>(0.61, 3.15)     | 0.4433  |
| Normal                       | 3588/4602 (77.97)                                    | 56/3588 (1.56)        | REF                      |         | 874/4602 (18.99)                                                | 7/874 (0.80)          | REF                      |         |
| <b>CV death/MI</b>           |                                                      |                       |                          |         |                                                                 |                       |                          |         |
| Severely Abnormal            | 365/4602 (7.93)                                      | 14/365 (3.84)         | 2.13<br>(1.16, 3.91)     | 0.0141  | 365/4602 (7.93)                                                 | 14/365 (3.84)         | 2.22<br>(0.83, 5.88)     | 0.1103  |
| Moderately Abnormal          | 217/4602 (4.72)                                      | 5/217 (2.30)          | 1.53<br>(0.60, 3.90)     | 0.3681  | 217/4602 (4.72)                                                 | 5/217 (2.30)          | 1.60<br>(0.47, 5.38)     | 0.4490  |
| Mildly Abnormal              | 432/4602 (9.39)                                      | 5/432 (1.16)          | 0.81<br>(0.32, 2.04)     | 0.6542  | 3146/4602 (68.36)                                               | 46/3146 (1.46)        | 1.02<br>(0.43, 2.39)     | 0.9678  |
| Normal                       | 3588/4602 (77.97)                                    | 48/3588 (1.34)        | REF                      |         | 874/4602 (18.99)                                                | 7/874 (0.80)          | REF                      |         |

CV indicates cardiovascular; MI, myocardial infarction; and UA, unstable angina.

**Supplemental Figure 1.** Kaplan-Meier curves demonstrating cumulative event rates based on the presence of myocardial ischemia and obstructive CAD for anatomic testing (A) and functional testing (B).

**A.**

**Anatomic Testing**

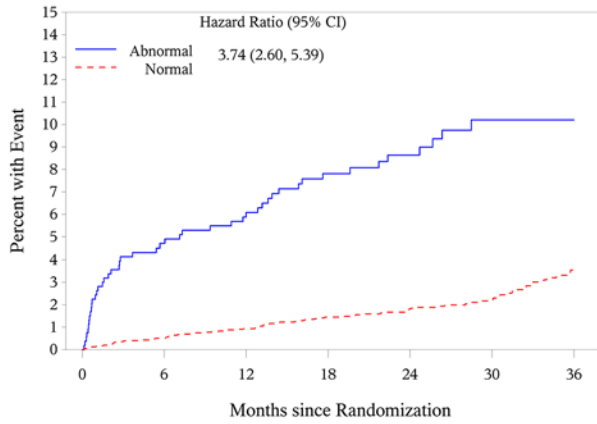

| # at Risk | Baseline (0) | 6 Mo. | 12 Mo. | 18 Mo. | 24 Mo. | 30 Mo. | 36 Mo. |
|-----------|--------------|-------|--------|--------|--------|--------|--------|
| Abnormal  | 534          | 496   | 466    | 378    | 279    | 169    | 81     |
| Normal    | 3966         | 3811  | 3556   | 2908   | 2190   | 1430   | 755    |

**B.**

**Functional Testing**

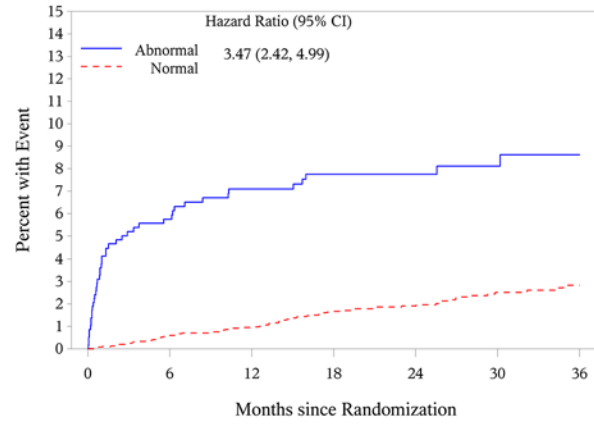

| # at Risk | Baseline (0) | 6 Mo. | 12 Mo. | 18 Mo. | 24 Mo. | 30 Mo. | 36 Mo. |
|-----------|--------------|-------|--------|--------|--------|--------|--------|
| Abnormal  | 582          | 503   | 455    | 386    | 280    | 186    | 102    |
| Normal    | 4020         | 3751  | 3428   | 2773   | 1992   | 1261   | 690    |
